# Supplementary material for: BETP degradation simultaneously targets acute myelogenous leukemic stem cells and the microenvironment
Source: JCI journal article supplement (doi:10.1172/jci120654), 2019-02-21
Supplement: sd1 [file 1]

Supplementary Figure 1

F

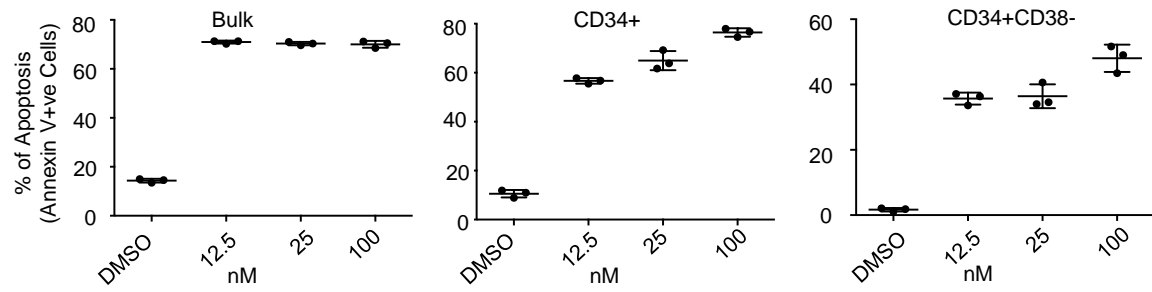

G

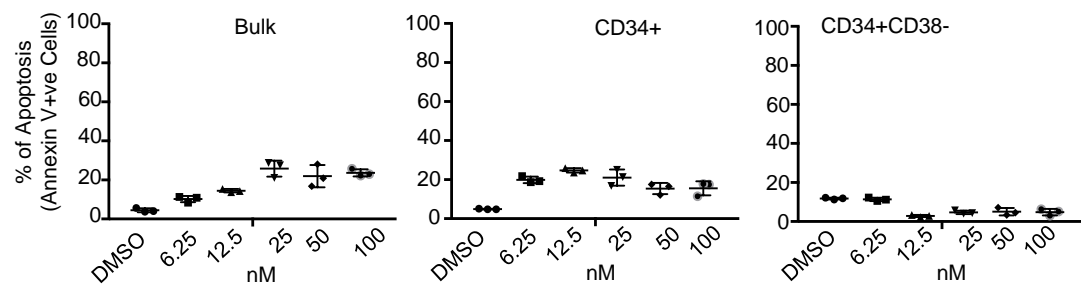

Supplementary Figure 2

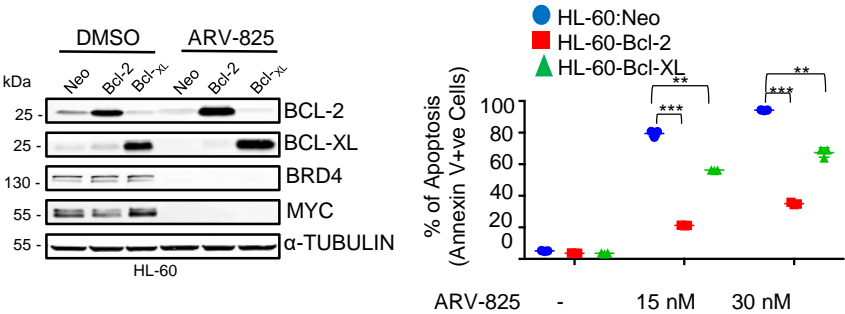

Supplementary Figure 3

**A**

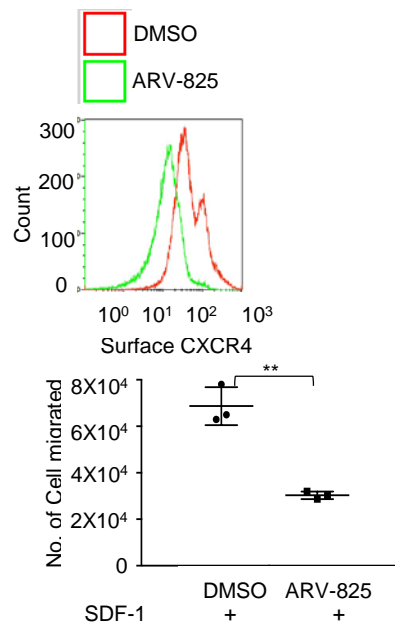

**B**

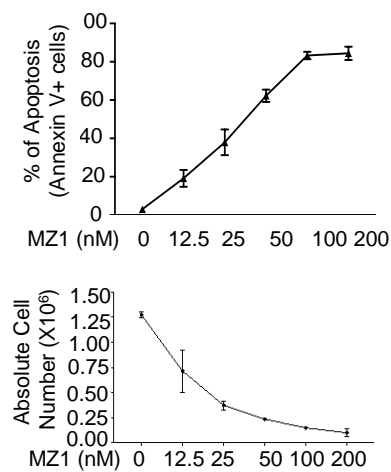

**C**

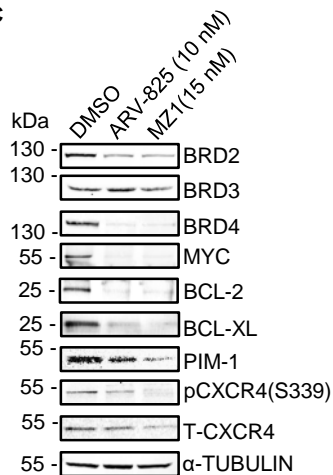

**D**

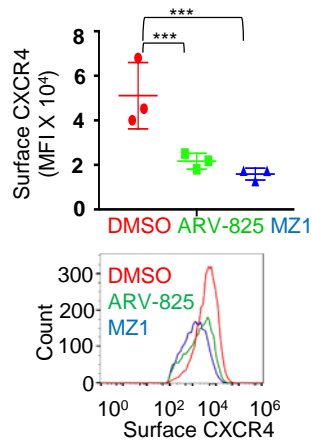

Supplementary Figure 4

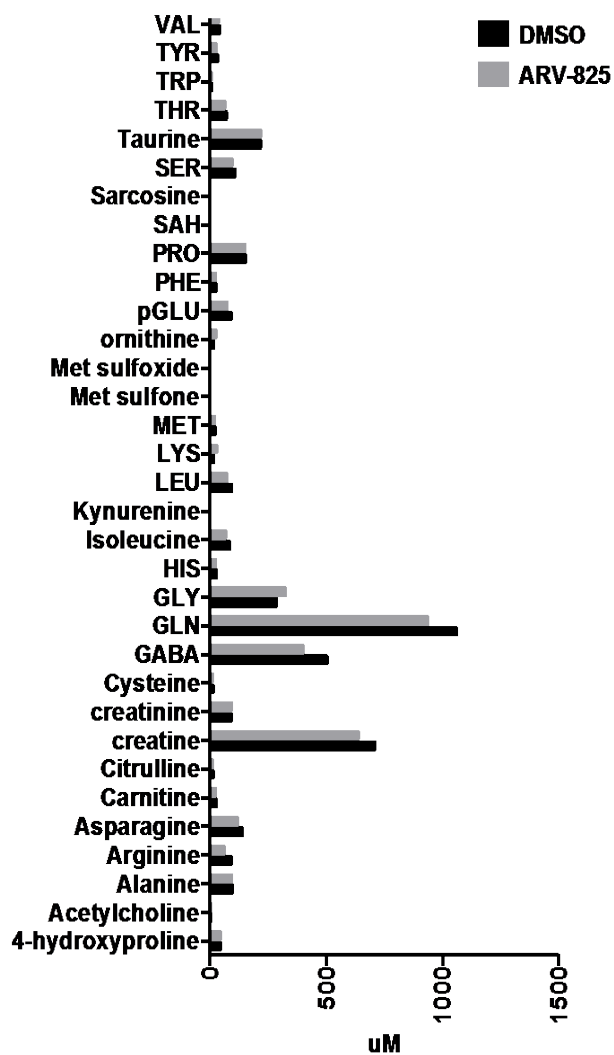

**Supplementary Figure 5**

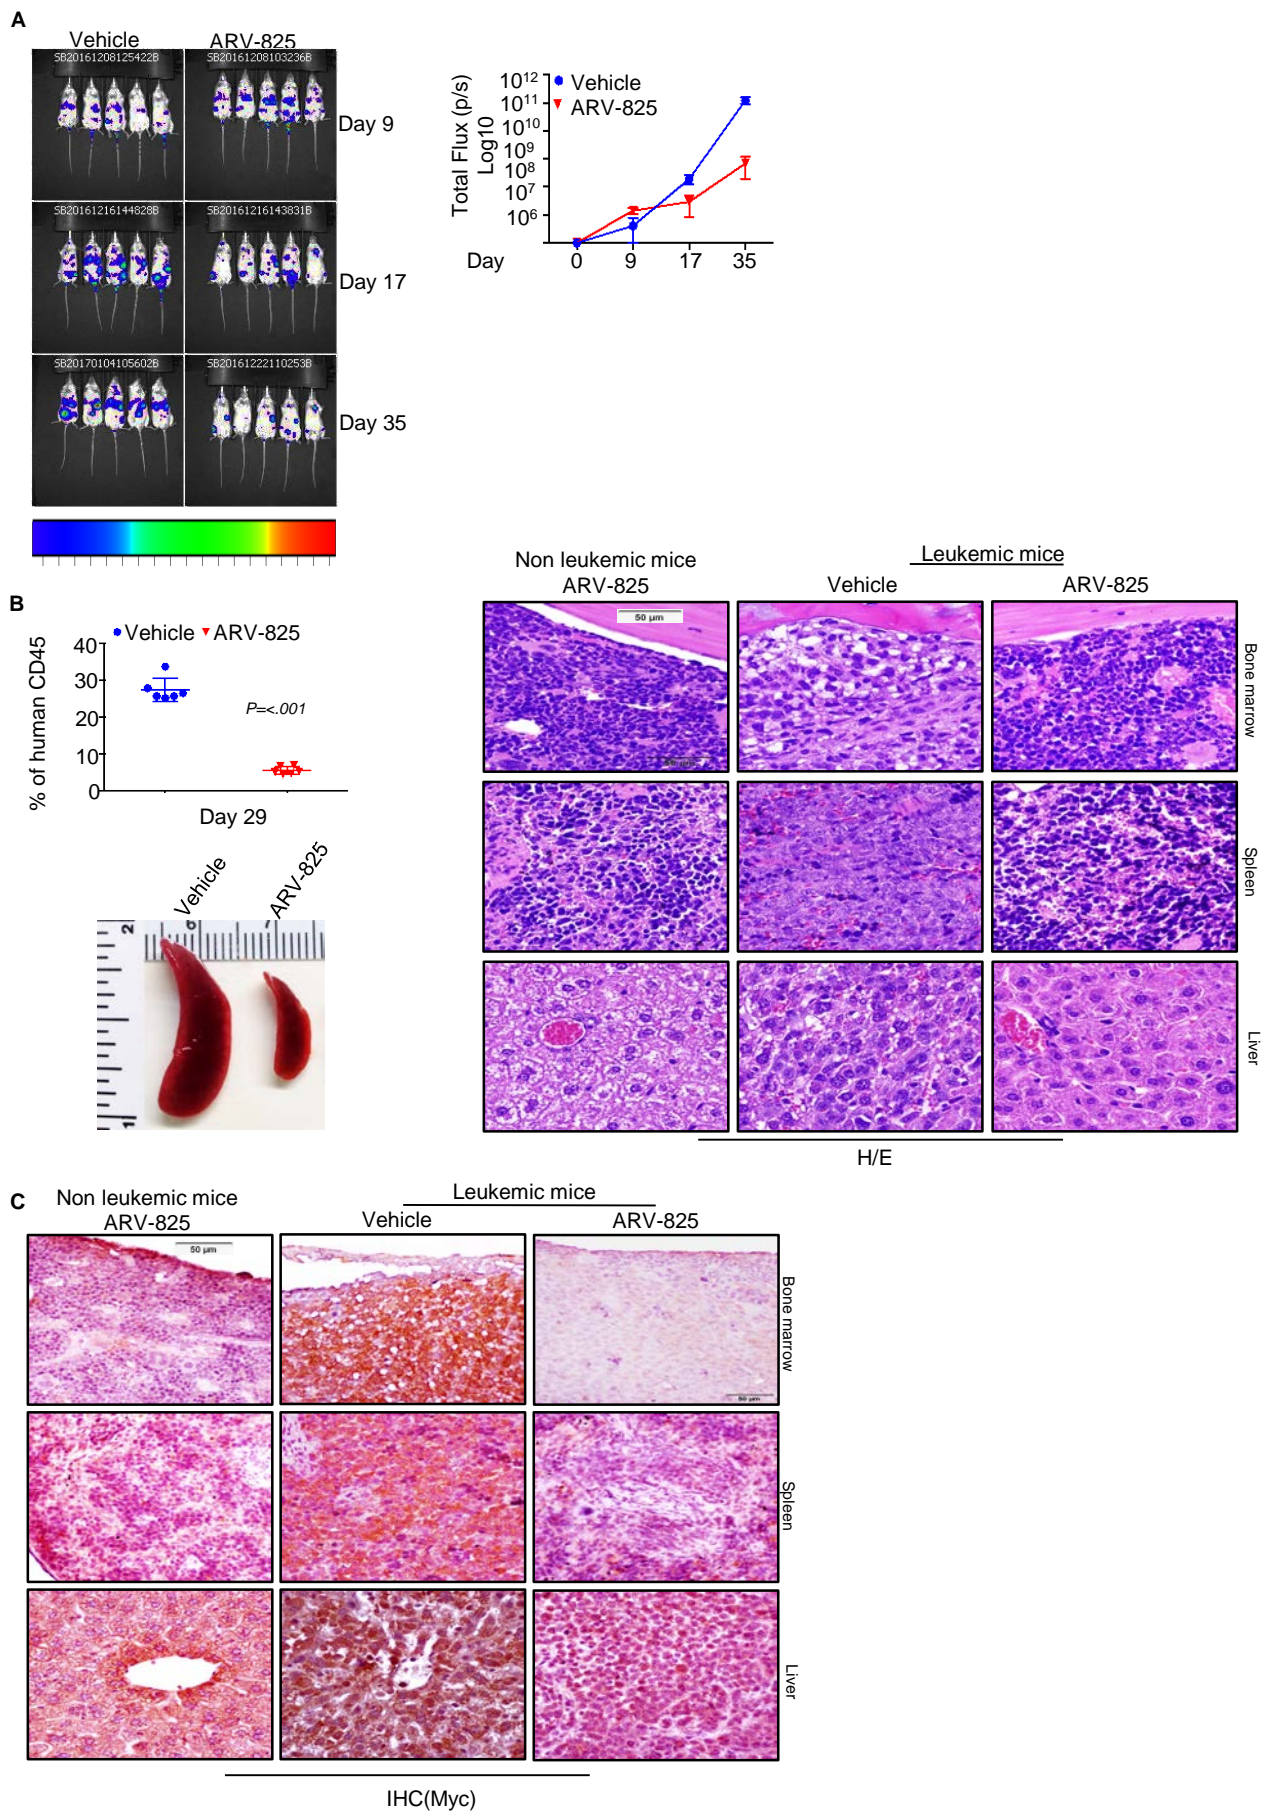

**D**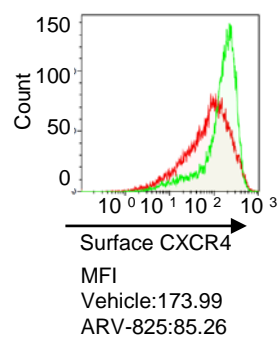**E**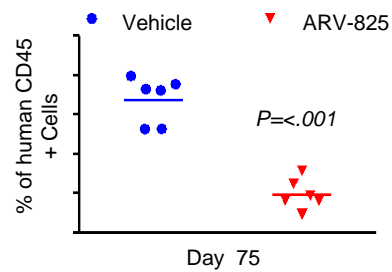**F**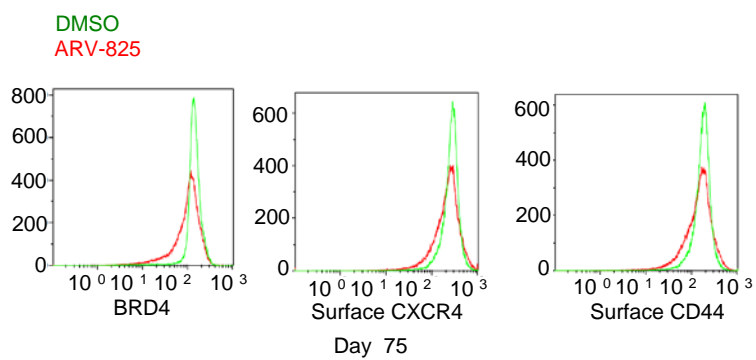

Supplementary Figure 6

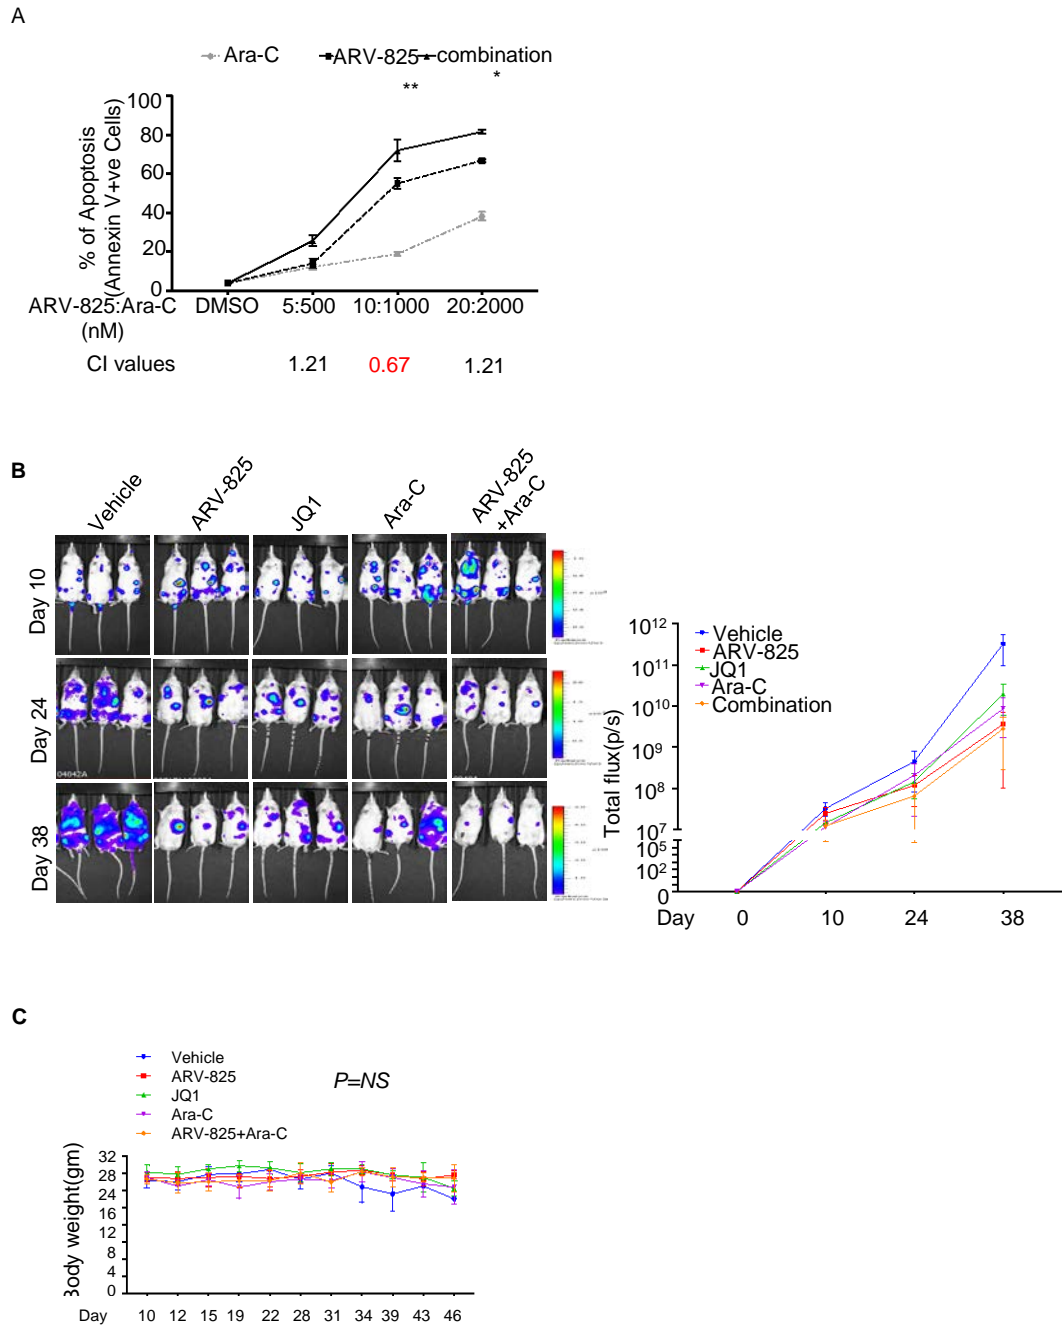

Supplementary Figure 7

A

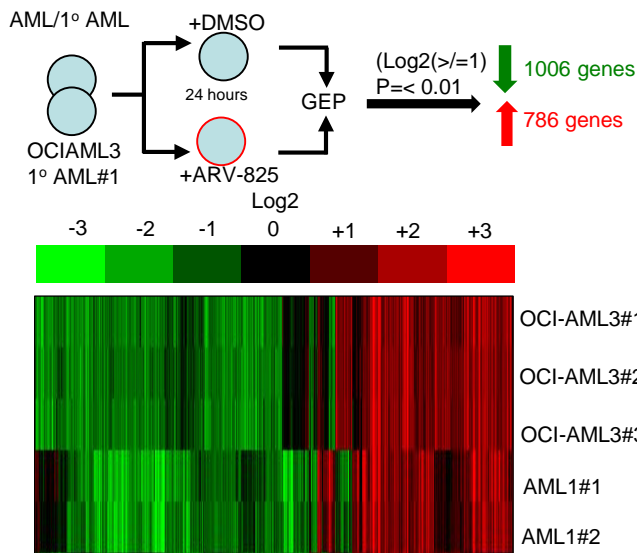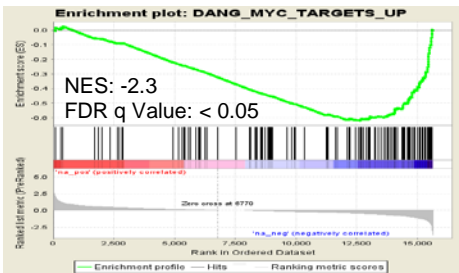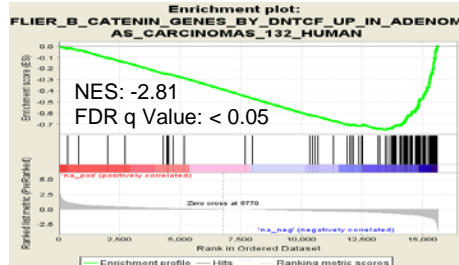

B

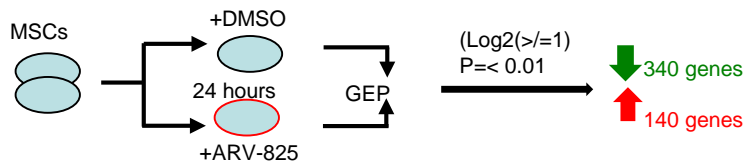

C

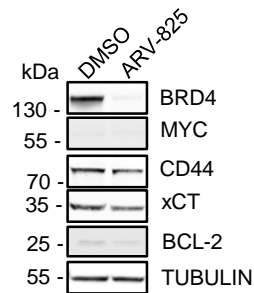

D

MYC Activity

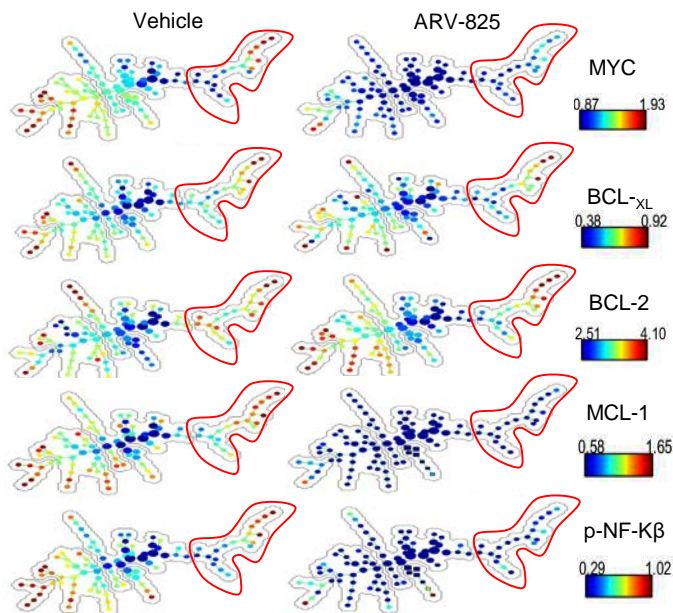

|         | MYC   | BCL-xL | BCL-2      | MCL-1 | p-NF-K $\beta$ |
|---------|-------|--------|------------|-------|----------------|
| Vehicle | 530.8 | 15.8   | 33560247.7 | 262.0 | 12.2           |
| ARV-825 | 4.7   | 9.9    | 1583032.4  | 4.2   | 2.6            |



E Wnt/b-catenin/Notch pathway

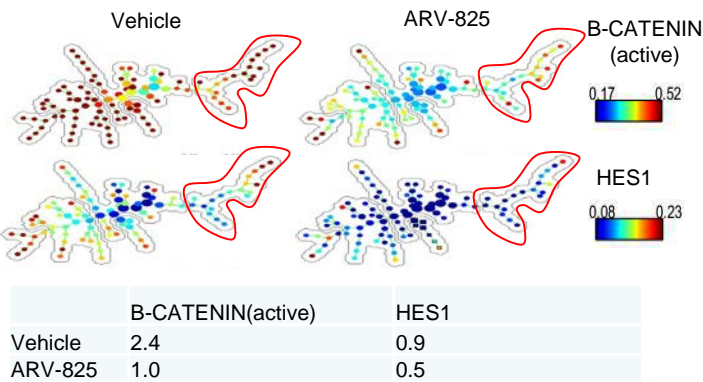

F Cell cycle/Apoptosis pathway

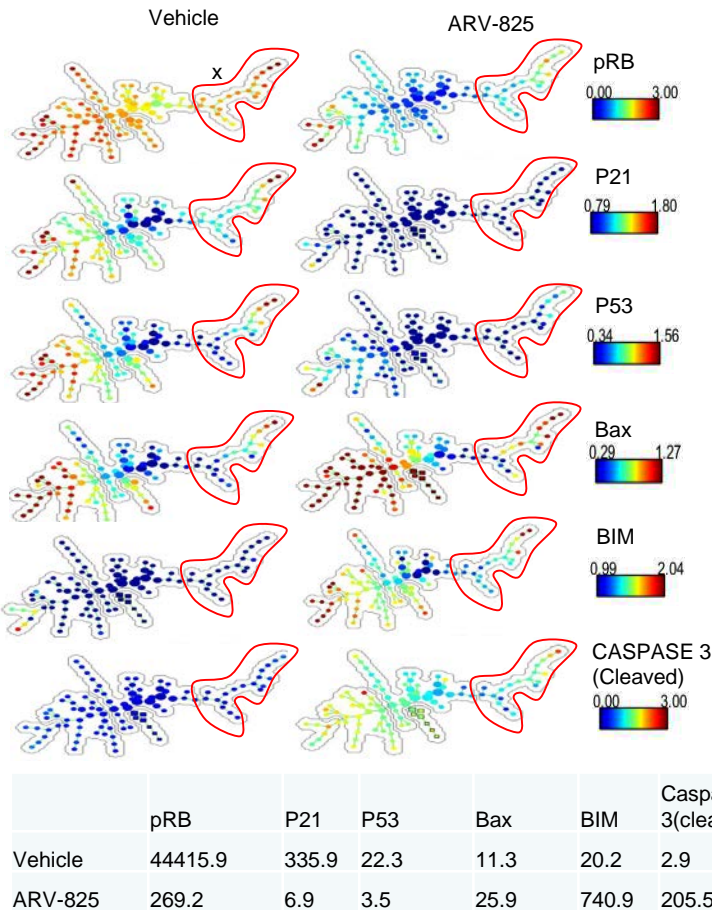

**G** PI3K/AKT/mTOR Pathway

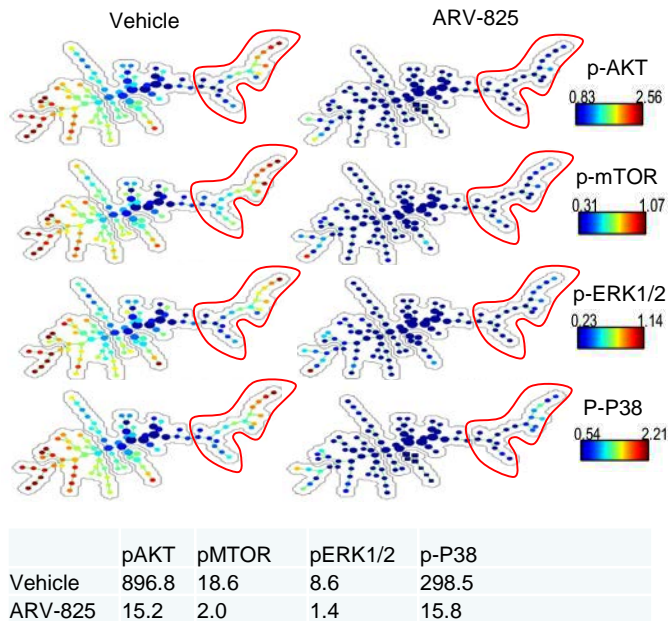

**H** Differentiation/Proliferation

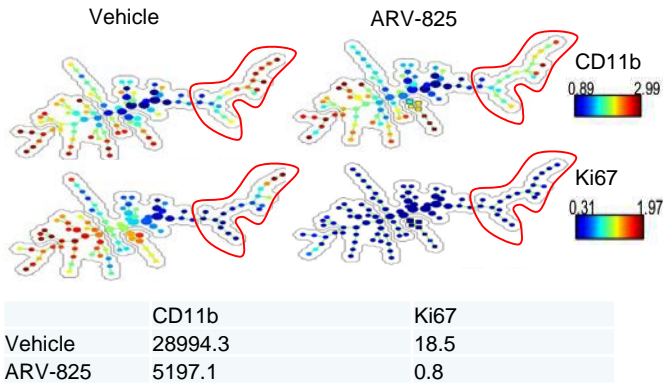

**I** Target inhibition

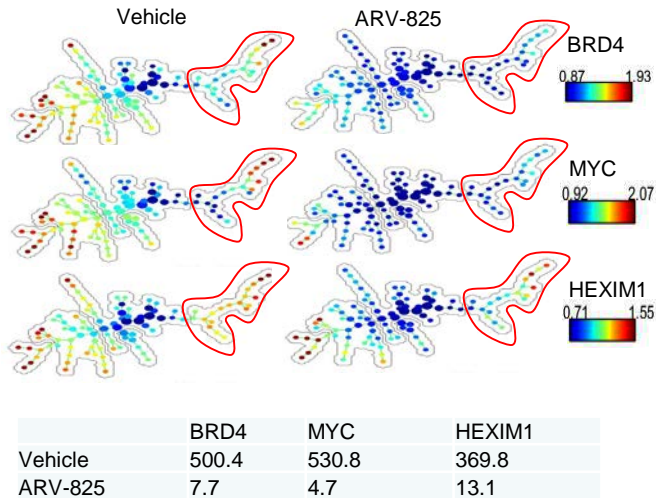

**J**   Tumor microenvironment

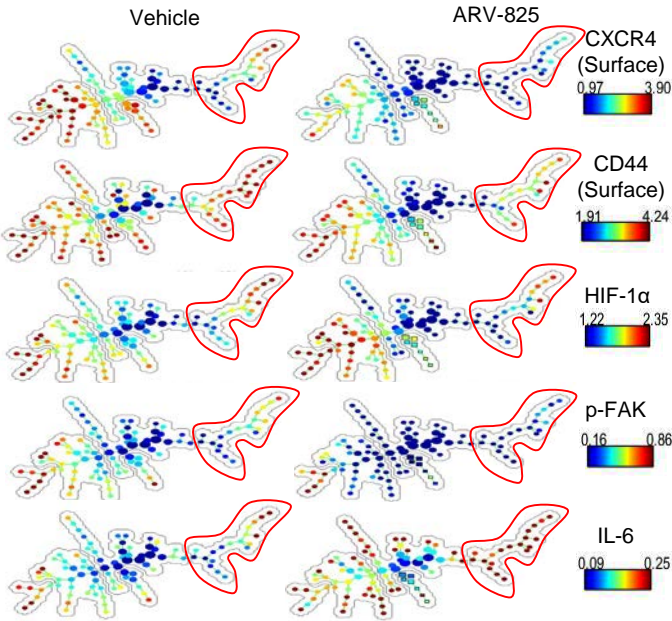

|         | CXCR4   | CD44        | HIF1a  | p-FAK | IL-6 |
|---------|---------|-------------|--------|-------|------|
| Vehicle | 12699.9 | 115855330.5 | 4347.5 | 3.5   | 0.9  |
| ARV-825 | 203.7   | 2772757.4   | 575.3  | 1.0   | 2.7  |

Supplementary Figure 8

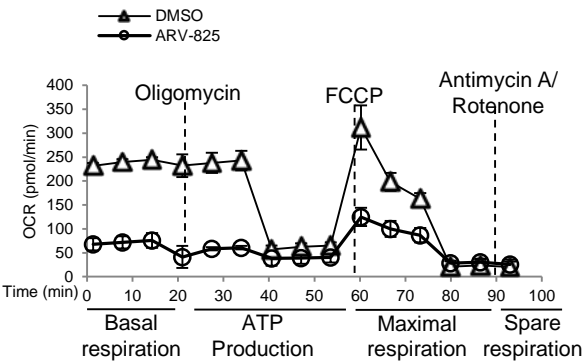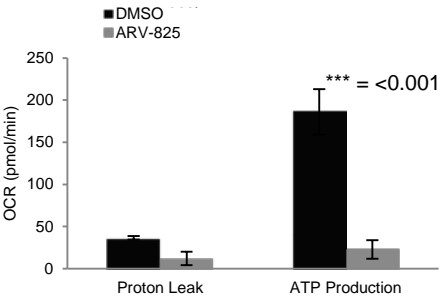

**Supplementary Figure 1:** (A) AML cell lines were treated with ARV-825 or JQ1 in wide range of concentration for 72 hours. Absolute cell numbers were enumerated using trypan blue staining based Beckmen Vi-CELL counter.

(B/C/) Ficoll AML mononuclear cells were cultured with increasing concentration of either ARV-825 or JQ1 for 72 hours and stained with Annexin V, CD45, CD34 and CD38 to quantify the percentage of apoptosis by flow cytometry.

(D/E/F) Ficoll AML mononuclear cells were cultured with increasing concentration of ARV-825 for 72 hours and stained with Annexin V, CD45, CD34 and CD38 to quantify the percentage of apoptosis by flow cytometry.

(G) normal bone marrow samples were cultured with increasing concentration of ARV-825 as indicated. After 72 hours, cell pellets were stained with Annexin V, CD45, CD34 and CD38 and cell survival in different subpopulations were determined by flow cytometry.

Data are representative of mean  $\pm$  SD from 3 independent seeding are plotted. The statistical significance between two groups was calculated by a standard Student's *t*-test (\*\* =  $<0.01$ , \*\*\* =  $<0.001$ , \* =  $<0.05$ ).

**Supplementary Figure 2:** Stably BCL-2 or BCL-XL overexpressed HL-60 cells were treated with ARV-825 for indicated different concentration for 24 hours or 72 hours and then determined the overexpression of protein (Left) and apoptosis (Right) by immunoblotting and flow cytometry respectively. Data represent the mean  $\pm$  SD \*\*\* =  $<0.001$ , \*\* =  $<0.01$  by Student's *t* test.

**Supplementary Figure 3:** Ficoll AML mononuclear cells were treated with ARV-825 (25 nM) or DMSO for 24 hours and surface expression of CXCR4 was determined by flow cytometry. Duplicate samples were subjected to 4 hours post incubation in SDF-1 (100 ng) containing media, the total number of migrated cells were measured (n=3). Data represent the mean  $\pm$  SD \*\*\* =  $<0.001$ , \*\* =  $<0.01$  by Student's *t* test.

(B) OCIAML3 cells were treated with different concentration of MZ1 for 72 hours and apoptosis and cell proliferation were determined by flow cytometry in three independent samples. (C) Immunoblot analysis of different proteins (left) and flow cytometry to surface expression of CXCR4 (Right) in OCIAML3 treated with ARV-825 (10 nM), MZ1(15 nM) for 24 hours. Data represent the mean  $\pm$  SD \*\*\* =  $<0.001$ , by Student's *t* test.

**Supplementary Figure 4:** OCI-AML3 cells treated with ARV-825 (10 nM) for 24 hours and mass

spectrometry-based analysis was performed to assess changes in intracellular amino acids.

**Supplementary Figure 5:** NOD/SCID/IL-2 $\gamma$ null (NSG) mice (6-wk-old) were injected with luciferase-labeled OCI-AML3 cells ( $1 \times 10^6$  cells) or AML-PDX ( $1 \times 10^6$  cells) through tail vein and ARV-825 (10 mg/kg) administered twice a week intra-peritoneally. (A) Mice were imaged and total flux counts compared to document engraftment and reduction of leukemia burden as indicated. (B) At d 29, 50  $\mu$ L of peripheral blood was collected by intra-orbital bleeding and tumor burden measured by detection of human CD45 cells (left top panel). At day 34 one mice from each group were sacrificed assess spleen size (left bottom panel) and Infiltration of Leukemia in other organs as indicated by hematoxylin and eosin staining (Right panel) (C) Bone marrow, spleen and Liver from each group were subjected to immunohistochemistry to detect the target inhibition, as Myc. The images were under the 60X magnification and 50  $\mu$ M scale. (D) Surface expression of CXCR4 in BM flushed by flow cytometry.

AML-PDX: (E) At d 75, 50  $\mu$ L of peripheral blood was collected by intra-orbital bleeding and tumor burden measured by detection of human CD45 cells. \*\*\* =  $<0.001$ , \*\* =  $<0.01$  by Student's t test.

(F) Target inhibition as BRD4 and surface expression of CXCR4 and CD44 was confirmed in PB.

**Supplementary Figure 6:** (A) OCIAML3 cells were treated with different concentration of ARV-825 and Ara-C in single or combination for 72 hours and apoptosis was measured with flow cytometry in 3 independent samples. Cumulative index (CI) at Ara-C (1000 nM) and ARV-825 (10nM) in highlighted as red showing the significant synergistic effect. Data represent the mean  $\pm$  SD \*\* =  $<0.01$ , \* =  $<0.05$  by Student's t test.

NOD/SCID/IL-2 $\gamma$ null (NSG) mice (6-wk-old) were injected with luciferase-labeled OCI-AML3 cells ( $1 \times 10^6$  cells) through tail vein and ARV-825 (10 mg/kg), JQ1 (50 mg/kg), Ara-C (50 mg/kg) and combination of ARV-825 and Ara-C were administered twice a week intra-peritoneally. (B) Mice were imaged and total flux counts compared to document engraftment and reduction of leukemia burden as indicated. (C) Body weight of all group mice were measured from day 10 to 46 (NS=non-significant).

**Supplementary Figure 7:** Gene set enrichment analysis (GSEA) was performed on Illumina GEP data on OCIAML3/Primary AML or MSCs cells treated with ARV-825 for 24 hours. (n=3) (A) AML: Gene expression profiling analysis (Top panel) and the heatmap (Bottom panel) generated shows mRNAs with a change in Log2 value  $\geq 1$  and  $P \leq 0.01$ . Gene set enrichment analysis (GSEA) for Myc target and Wnt/B-catenin signaling in ARV-825 treated case (right panel). (B) MSC: Gene expression profiling analysis shows mRNAs with a change in Log2 value  $\geq 1$  and  $P \leq 0.01$  (C) Validation of inhibition of target in MSCs with ARV-825 treatment MSCs were treated with DMSO or ARV-825 for 24 hours. The whole cell lysates were subjected to immunoblotting with specific antibodies. Tubulin was used as loading control BM cells were collected from Vehicle/ARV-825 treated mice with AML-PDX and SPADE tree analysis of mouse BM cell populations determined by CyTOF. COLORS SPADE tree according to its colored versions based on (intensities) of different proteins were illustrated while ArcSinh-transformed counts for each proteins were illustrated in Boxes in CD34+CD38-CD90-CD45RA+ LSC (dotted red box) for (D) Myc activity PI3K/AKT/mTOR, (E) WNT/B-CATENIN (F) Cell cycle/Apoptosis, (G) PI3K/AKT/mTOR (H) differentiation/proliferation (I) target inhibition and (J) tumor microenvironment related protein expression.

**Supplementary Figure 8:** Oxygen consumption rate (OCR) measurements were obtained over time (in min) using an extracellular flux analyzer (Seahorse Bioscience). The mitochondrial metabolic activity test was used to obtain bioenergetics parameters, by adding the ATP synthase inhibitor Oligomycin A (2  $\mu$ M), to derive ATP-linked OCR, FCCP (1.6  $\mu$ M) to uncouple the mitochondria for maximal OCR, and antimycin A (0.5  $\mu$ M).

### Supplementary table

Table 1: Comparison of IC<sub>50</sub> between ARV-825 and JQ1

| Cell line | Cell types | Characteristics                     | IC <sub>50</sub> to ARV-825 | IC <sub>50</sub> to JQ1 |
|-----------|------------|-------------------------------------|-----------------------------|-------------------------|
| MV4;11    | AML-M5     | ITD(m/m), t(4;11)                   | 2.02 pM                     | 60 nM                   |
| OCI-AML3  | AML-M4     | NPMc+, DNMT3Am (R822C), NRASm(Q61L) | 8.3 nM                      | 102 nM                  |
| HL60      | AML-M2     | NRASm (Q61L)                        | 13.7 nM                     | 349.4 nM                |
| MOLM14    | AML-M5a    | ITD, t(9;11)                        | 18.7 nM                     | 98.3 $\mu$ M            |
| KBM5      | CML-BC     | BCRABL                              | 26.7 nM                     | 2.5 $\mu$ M             |
| OCI-AML2  | AML-M4     | NPMwt, DNMT3Am(R635W)               | 35 nM                       | 525 nM                  |

|        |         |                    |         |          |
|--------|---------|--------------------|---------|----------|
| U937   | AML-M5  | FLT3WT/CALM-AF10   | 44.1 nM | 151.7 nM |
| MOLM13 | AML-M5a | ITD (m/w), t(9;11) | 54.7 nM | 2321 nM  |
| THP1   | AML-M5  | NRASm (G12D)       | 64.2 nM | 528.5 nM |

AML cell lines were treated with ARV-825 or JQ1 in wide range of concentration for 72 hours. Based on inhibition of cell proliferation IC50 values were calculated using Calcsyn software.

Table 2: Sustained effect of ARV-825

| Day 3<br>Absolute Cell number( X10 <sup>6</sup> ) |             |            | Day 3<br>% of Apoptosis(Annexin V+ cells) |            |            |
|---------------------------------------------------|-------------|------------|-------------------------------------------|------------|------------|
| DMSO                                              | ARV-825     | JQ1        | DMSO                                      | ARV-825    | JQ1        |
| 0.75 ± 0.06                                       | 0.17 ± 0.02 | 0.6 ± 0.05 | 2.63 ± 0.02                               | 66.9 ± 6.6 | 4.4 ± 0.03 |

OCI-AML3 cells were treated with ARV-825 (10 nM), JQ1 (100 nM) or DMSO for 24 h. Cells were washed with PBS to remove the respective drugs and re-plated in equal numbers in complete media without any drug for an additional 48 h. After 48 h, cell numbers and percentage apoptosis were assessed.

Table 3: Antibodies used in CyTOF

| Antigen            | Conjugate | Supplier      | Catalog number |
|--------------------|-----------|---------------|----------------|
| ARC                | 170Er     | SantaCruz     | sc-374177      |
| Bax                | 173Yb     | CST           | 2774BF         |
| b-catenin, active  | 150Nd     | EMD           | 05-665         |
| Bcl-2              | 158Gd     | BioLegend     | 658702         |
| Bcl-xL             | 141Pr     | CST           | 2764BF         |
| Bcl-xL             | 141Pr     | CST           | 2764BF         |
| BIM (EL, L, S)     | 146Nd     | CST           | 2819BF         |
| BRD4               | 153Eu     | BETHYL        | A301-985A50    |
| Caspase 3, Cleaved | 142Nd     | DVS-Sunnyvale | 3142004A       |
| CD11b              | 144Nd     | DVS-Fluidigm  | 3144001B       |
| CD123              | 145Nd     | BD            | 554527         |
| CD134              | 148Nd     | BioLegend     | 350002         |
| CD34               | 148Nd     | BD            | 555820         |
| CD38               | 168Er     | BioLegend     | 303502         |
| CD44               | 171Yb     | BioLegend     | 103002         |
| CD44               | 171Yb     | DVS-Sunnyvale | 3171003B       |
| CD45               | 139La     | BioLegend     | 304002         |
| CD45RA             | 170Er     | BioLegend     | 304102         |
| CD86               | 150Nd     | DVS-Fluidigm  | 3150020B       |
| CD90               | 143Nd     | BioLegend     | 328102         |
| c-Myc              | 163Dy     | CST           | 5605BF         |
| CXCR4              | 172Yb     | BioLegend     | 306502         |
| Hes1               | 151Eu     | Abcam         | ab55265        |



|                 |       |               |            |
|-----------------|-------|---------------|------------|
| HEXIM1          | 161Dy | Proteintech   | 15676-1-AP |
| HIF-1a          | 165Ho | Novus         | NB100-479  |
| IL-6            | 147Sm | DVS-Fluidigm  | 3147002B   |
| Ki67            | 176Yb | BioLegend     | 350502     |
| LKB1            | 154Sm | CST           | 3047BF     |
| Mcl-1           | 160Gd | CST           | 5453BF     |
| Mcl-1           | 176Yb | BD            | 559027     |
| p21             | 160Gd | Abcam         | ab16767    |
| p21, WAF1/Cip1  | 154Sm | Sigma         | P1484      |
| p53             | 169Tm | BioLegend     | 645702     |
| p-AKT           | 144Nd | BD            | 560397     |
| p-AKT 152Sm     | 152Sm | DVS-Fluidigm  | 3152005A   |
| p-AMPKa(T172)   | 164Dy | CST           | 2535BF     |
| p-ERK1/2        | 167Er | DVS-Sunnyvale | 3167005A   |
| p-FAK(Y397)     | 175Lu | CST           | 8556BF     |
| P-mTOR          | 164Dy | CST           | 5536BF     |
| p-NFkB          | 149Sm | CST           | 3033       |
| P-p38(180/182)  | 156Gd | DVS-Sunnyvale | 3156002A   |
| p-Rb(S807/S811) | 162Dy | BD            | 558389     |
| p-STAT5(Y694)   | 175Lu | CST           | 9314BF     |
| p-SYK           | 149Sm | BD            | 558167     |
| p-JNK           | 153Eu | CST           | 9255BF     |

Table 4: Primer Sequences

| No. | Primer    | Forward (5'-3')           | Reverse (5'-3')          |
|-----|-----------|---------------------------|--------------------------|
| 1.  | CD44      | GCAGTCAACAGTCAAGAAGG      | TGTCCTCCACAGCTCCATT      |
| 2.  | CD44v6    | TCC AGG CAA CTC CTA       | CAG CTG TCC CTG TTG      |
| 3.  | CD44v8-10 | TCCCAGACGAAGACAGTCCCTGGAT | CACTGGGGTGAATGTGTCTTGGTC |
| 4.  | AXIN2     | CCACACCCTTCTCCAATCC       | TGCCAGTTTCTTTGGCTCTT     |
| 5.  | Fra-1     | AGTCAGGAGCTGCAGTGGATGGT   | TCAGTTCCTCCTCCGGTTCCTGC  |
| 6.  | 18S rRNA  | GTAACCCGTTGAACCCCAT       | CCATCCAATCGGTAGTAGCG     |

Table 5: Details of primary human AML sample used in this study

| Patient | Sex | Age(yrs) | Mutation              | Blast | Experimental figure |
|---------|-----|----------|-----------------------|-------|---------------------|
| PT1     | M   | 58       | FLT3(D835)            | 91%   | 1D                  |
| PT2     | M   | 86       | ASXL, TP53, MPL       | 39%   | 2C/Suppl 1B         |
| PT3     | F   | 64       | JAK2, MPL, WT1, CEBPA | 98%   | Suppl 1C            |
| PT4     | M   | 33       | KIT, IDH2             | 76%   | Suppl. 1D           |
| PT5     | F   | 62       | RUNX1, IDH2, FLT-ITD  | 70%   | Suppl 1E            |

|     |     |   |    |                      |     |                    |
|-----|-----|---|----|----------------------|-----|--------------------|
| 104 | PT6 | F | 82 | NPM1,IDH2            | 77% | Suppl 1F/ suppl 3A |
| 105 | PT7 | M | 33 | FLT3(D835),NRAS,KRAS | 58% | 7A/D / suppl 7A    |
| 106 |     |   |    |                      |     |                    |
